# Supplementary material for: Effect of efflux pump inhibition on Pseudomonas aeruginosa transcriptome and virulence
Source: PubMed Central journal article supplement (PMC5596013; doi:10.1038/s41598-017-11892-9), 2017-09-12

# **Effect of efflux pump inhibition on *Pseudomonas aeruginosa* transcriptome and virulence**

Giordano Rampioni<sup>1</sup>, Cejoice Ramachandran Pillai<sup>1#</sup>, Francesca Longo<sup>1</sup>, Roslen Bondi<sup>1</sup>, Valerio Baldelli<sup>1</sup>, Marco Messina<sup>1</sup>, Francesco Imperi<sup>2</sup>, Paolo Visca<sup>1</sup>, Livia Leoni<sup>1\*</sup>

<sup>1</sup>*Department of Science, University Roma Tre, Rome, Italy;* <sup>2</sup>*Department of Biology and Biotechnology "Charles Darwin", Sapienza University of Rome, Rome, Laboratory affiliated to Istituto Pasteur Italia – Fondazione Cenci Bolognetti, Rome, Italy.*

Present address: <sup>#</sup>Inter University Centre for Bioscience, Kannur University, Palayad, Kerala, India.

\* Corresponding author: Livia Leoni - livia.leoni@uniroma3.it

## **Supporting Information**

**Table S1. Genes whose transcription is affected by PABN**

**Table S2. Bacterial strains used in this study**

**Table S3. Oligonucleotides used in this study**

**Figure S1. Effect of PABN on *P. aeruginosa* growth**

**Figure S2. Effect of PABN on the promoter activity of *lasI* and *lasR* genes**

**Table S1. Genes whose transcription is affected by PAβN**

| PA number <sup>a</sup>      | Gene name <sup>a</sup> | Fold change <sup>b</sup> | Product name <sup>a</sup>                            |
|-----------------------------|------------------------|--------------------------|------------------------------------------------------|
| PA0509*                     | <i>nirN</i>            | 2.27                     | NirN                                                 |
| PA0510*                     | <i>nirE</i>            | 2.33                     | NirE                                                 |
| PA0511*                     | <i>nirJ</i>            | 2.23                     | heme <i>d</i> <sub>1</sub> biosynthesis protein NirJ |
| PA0514*                     | <i>nirL</i>            | 2.3                      | heme <i>d</i> <sub>1</sub> biosynthesis protein NirL |
| PA0516*                     | <i>nirF</i>            | 2.3                      | heme <i>d</i> <sub>1</sub> biosynthesis protein NirF |
| PA0517*                     | <i>nirC</i>            | 3.53                     | probable <i>c</i> -type cytochrome precursor         |
| PA0518*                     | <i>nirM</i>            | 3.32                     | cytochrome <i>c</i> <sub>551</sub> precursor         |
| PA0519*                     | <i>nirS</i>            | 4.48                     | nitrite reductase precursor                          |
| PA0523*                     | <i>norC</i>            | 2.87                     | nitric-oxide reductase subunit C                     |
| PA0524*                     | <i>norB</i>            | 5.51                     | nitric-oxide reductase subunit B                     |
| PA0525*                     | <i>norD</i>            | 2.19                     | probable dinitrification protein NorD                |
| PA0526                      | ---                    | 2.54                     | hypothetical protein                                 |
| PA0672 <sup>f</sup>         | <i>hemO</i>            | -4.81                    | heme oxygenase                                       |
| PA0676 <sup>f</sup>         | <i>vreR</i>            | -4.85                    | sigma factor regulator, VreR                         |
| PA0688                      | <i>lapA</i>            | -3.16                    | low-molecular-weight alkaline phosphatase A, LapA    |
| PA0697                      | ---                    | -3.74                    | hypothetical protein                                 |
| PA0698                      | ---                    | -3.03                    | hypothetical protein                                 |
| PA0707                      | <i>toxR</i>            | -2.12                    | transcriptional regulator ToxR                       |
| PA0842                      | ---                    | -4.32                    | probable glycosyl transferase                        |
| PA0918                      | ---                    | 2.26                     | cytochrome <i>b</i> <sub>561</sub>                   |
| PA1116                      | ---                    | -3.13                    | hypothetical protein                                 |
| <b>PA1168</b>               | ---                    | 2.94                     | hypothetical protein                                 |
| PA1169                      | ---                    | 2.41                     | probable lipoxygenase                                |
| PA1213                      | ---                    | 2.03                     | hypothetical protein                                 |
| <b>PA1215</b>               | ---                    | 2.64                     | hypothetical protein                                 |
| <b>PA1217</b>               | ---                    | 2.38                     | probable 2-isopropylmalate synthase                  |
| <b>PA1221</b>               | ---                    | 2.01                     | hypothetical protein                                 |
| <b>PA1245</b>               | <i>aprX</i>            | -3.44                    | AprX                                                 |
| PA1300 <sup>f</sup>         | ---                    | -4.92                    | ECF sigma factor                                     |
| PA1301 <sup>f</sup>         | ---                    | -3.43                    | probable transmembrane sensor                        |
| PA1355 <sup>f</sup>         | ---                    | -2.99                    | hypothetical protein                                 |
| PA1877                      | ---                    | -2.16                    | probable secretion protein                           |
| <b>PA1901</b> <sup>§</sup>  | <i>phzC1</i>           | 2.24                     | phenazine biosynthesis protein PhzC                  |
| <b>PA1902</b> <sup>§</sup>  | <i>phzD1</i>           | 2.26                     | phenazine biosynthesis protein PhzD                  |
| <b>PA1903</b> <sup>§</sup>  | <i>phzE1</i>           | 2.22                     | phenazine biosynthesis protein PhzE                  |
| <b>PA1904</b> <sup>§†</sup> | <i>phzF1</i>           | 2.11                     | probable phenazine biosynthesis protein              |
| PA1912 <sup>f</sup>         | <i>femI</i>            | -2.35                    | ECF sigma factor, FemI                               |
| PA2033                      | ---                    | -4.72                    | hypothetical protein                                 |
| PA2034                      | ---                    | -3.92                    | hypothetical protein                                 |
| <b>PA2143</b>               | ---                    | -2.2                     | hypothetical protein                                 |
| PA2384                      | ---                    | -4.71                    | hypothetical protein                                 |
| PA2385 <sup>f</sup>         | <i>pvdQ</i>            | -2.98                    | 3OC <sub>12</sub> -homoserine lactone acylase PvdQ   |
| PA2386 <sup>f</sup>         | <i>pvdA</i>            | -3.97                    | L-ornithine <i>N</i> <sup>5</sup> -oxygenase         |
| PA2393                      | ---                    | -3.09                    | putative dipeptidase                                 |

| PA number <sup>a</sup>    | Gene name <sup>a</sup> | Fold change <sup>b</sup> | Product name <sup>a</sup>                                |
|---------------------------|------------------------|--------------------------|----------------------------------------------------------|
| PA2394 <sup>f</sup>       | <i>pvdN</i>            | -2.85                    | PvdN                                                     |
| PA2395 <sup>f</sup>       | <i>pvdO</i>            | -2.32                    | PvdO                                                     |
| PA2396 <sup>f</sup>       | <i>pvdF</i>            | -3.22                    | pyoverdine synthetase F                                  |
| PA2397 <sup>f</sup>       | <i>pvdE</i>            | -3.16                    | pyoverdine biosynthesis protein PvdE                     |
| PA2398 <sup>f</sup>       | <i>fpvA</i>            | -2.03                    | ferripyoverdine receptor                                 |
| PA2399 <sup>f</sup>       | <i>pvdD</i>            | -3.32                    | pyoverdine synthetase D                                  |
| PA2400 <sup>f</sup>       | <i>pvdJ</i>            | -3.36                    | PvdJ                                                     |
| PA2402 <sup>f</sup>       | ---                    | -3.43                    | probable non-ribosomal peptide synthetase                |
| PA2405                    | ---                    | -2.42                    | hypothetical protein                                     |
| PA2411                    | ---                    | -4.31                    | probable thioesterase                                    |
| PA2412                    | ---                    | -6.16                    | conserved hypothetical protein                           |
| PA2413 <sup>f</sup>       | <i>pvdH</i>            | -3.58                    | L-2,4-diaminobutyrate:2-ketoglutarate 4-aminotransferase |
| PA2424 <sup>f</sup>       | <i>pvdL</i>            | -3.73                    | PvdL                                                     |
| PA2425 <sup>f</sup>       | <i>pvdG</i>            | -2.58                    | PvdG                                                     |
| PA2426 <sup>f</sup>       | <i>pvdS</i>            | -10.48                   | sigma factor PvdS                                        |
| PA2427                    | ---                    | -3.62                    | hypothetical protein                                     |
| PA2428                    | ---                    | -18.06                   | hypothetical protein                                     |
| <b>PA2570</b>             | <i>lecA</i>            | -2.42                    | LecA                                                     |
| PA2593                    | <i>qteE</i>            | 2.06                     | quorum threshold expression element, QteE                |
| <b>PA3195</b>             | <i>gapA</i>            | 2.14                     | glyceraldehyde 3-phosphate dehydrogenase                 |
| PA3377 <sup>o</sup>       | <i>phnJ</i>            | -21.1                    | conserved hypothetical protein                           |
| PA3392 <sup>*</sup>       | <i>nosZ</i>            | 2.16                     | nitrous-oxide reductase precursor                        |
| PA3407 <sup>f</sup>       | <i>hasAp</i>           | -4.15                    | heme acquisition protein HasAp                           |
| PA3410                    | <i>hasI</i>            | -2.03                    | HasI                                                     |
| PA3530 <sup>f</sup>       | <i>bfd</i>             | -2.54                    | bacterioferritin-associated ferredoxin Bfd               |
| PA3581                    | <i>glpF</i>            | -2.06                    | glycerol uptake facilitator protein                      |
| PA3586                    | ---                    | -2.2                     | probable hydrolase                                       |
| PA3602                    | <i>yerD</i>            | 2.07                     | conserved hypothetical protein                           |
| PA3720                    | ---                    | 2.87                     | hypothetical protein                                     |
| PA3880                    | ---                    | 2.63                     | conserved hypothetical protein                           |
| PA3899                    | <i>fecI</i>            | -2.25                    | FecI                                                     |
| <b>PA4139<sup>†</sup></b> | ---                    | 2.01                     | hypothetical protein                                     |
| PA4220                    | <i>fptB</i>            | -2.48                    | hypothetical protein                                     |
| PA4221 <sup>f</sup>       | <i>fptA</i>            | -2.52                    | Fe(III)-pyochelin outer membrane receptor precursor      |
| PA4224 <sup>f</sup>       | <i>pchG</i>            | -2.05                    | pyochelin biosynthetic protein PchG                      |
| PA4225 <sup>f</sup>       | <i>pchF</i>            | -2.26                    | pyochelin synthetase                                     |
| PA4226 <sup>f</sup>       | <i>pchE</i>            | -2.06                    | dihydroaeruginic acid synthetase                         |
| PA4228 <sup>f</sup>       | <i>pchD</i>            | -2.09                    | pyochelin biosynthesis protein PchD                      |
| PA4230 <sup>f</sup>       | <i>pchB</i>            | -2.69                    | salicylate biosynthesis protein PchB                     |
| PA4333                    | <i>fumA</i>            | 2.01                     | probable fumarase                                        |
| PA4430                    | ---                    | 2.28                     | probable cytochrome <i>b</i>                             |
| PA4467                    | ---                    | -3.7                     | hypothetical protein                                     |
| PA4468                    | <i>sodM</i>            | -11.65                   | superoxide dismutase                                     |
| PA4469                    | ---                    | -10.96                   | hypothetical protein                                     |
| PA4470                    | <i>fumCI</i>           | -8.96                    | fumarate hydratase                                       |
| PA4471                    | <i>fagA</i>            | -7.96                    | hypothetical protein                                     |

| PA number <sup>a</sup> | Gene name <sup>a</sup> | Fold change <sup>b</sup> | Product name <sup>a</sup>                                 |
|------------------------|------------------------|--------------------------|-----------------------------------------------------------|
| PA4504                 | <i>dppC</i>            | 2.18                     | probable permease of ABC transporter                      |
| PA4515                 | <i>piuC</i>            | -2.48                    | conserved hypothetical protein                            |
| PA4570                 | ---                    | -5.53                    | hypothetical protein                                      |
| PA4587                 | <i>ccpR</i>            | 3.2                      | cytochrome <i>c<sub>551</sub></i> peroxidase precursor    |
| <b>PA4703</b>          | ---                    | -2.04                    | hypothetical protein                                      |
| PA4708 <sup>‡</sup>    | <i>phuT</i>            | -3.17                    | heme-transport protein, PhuT                              |
| PA4709 <sup>‡</sup>    | <i>phuS</i>            | -3.37                    | PhuS                                                      |
| PA4710 <sup>‡</sup>    | <i>phuR</i>            | -4.65                    | memo/memoglobin uptake outer membrane receptor PhuR       |
| PA4810 <sup>*</sup>    | <i>fdnI</i>            | 2.22                     | nitrate-inducible formate dehydrogenase, $\gamma$ subunit |
| PA5091                 | <i>hutG</i>            | 2.11                     | <i>N</i> -formylglutamate amidohydrolase                  |
| PA5098                 | <i>hutH</i>            | 3.16                     | histidine ammonia-lyase                                   |
| PA5100                 | <i>hutU</i>            | 2.95                     | urocanase                                                 |
| PA5360 <sup>◊</sup>    | <i>phoB</i>            | -15.28                   | two-component response regulator PhoB                     |
| PA5365 <sup>◊</sup>    | <i>phoU</i>            | -9.4                     | phosphate uptake regulatory protein PhoU                  |
| PA5366 <sup>◊</sup>    | <i>pstB</i>            | -14.02                   | ATP-binding component of ABC phosphate transporter        |
| PA5367 <sup>◊</sup>    | <i>pstA</i>            | -14.17                   | membrane protein component of ABC phosphate transporter   |
| PA5369 <sup>◊</sup>    | <i>pstS</i>            | -23.49                   | periplasmic phosphate-binding protein, PstS               |
| PA5410                 | <i>gbcA</i>            | 2.14                     | GbcA                                                      |

<sup>a</sup> PA number, gene name and product name are from the *Pseudomonas* Genome Database<sup>23</sup>. Genes previously reported as controlled by 3OC<sub>12</sub>-HSL are in bold characters<sup>36-38</sup>. \*, genes involved in nitrogen metabolism; §, genes involved in phenazines biosynthesis; †, genes previously reported to be controlled by iron-starvation<sup>25</sup>; ◊, genes previously reported to be controlled by phosphate-starvation<sup>27</sup>; ‡, genes previously reported to be controlled by colistin<sup>31</sup>.

<sup>b</sup> Fold change in gene expression in *P. aeruginosa* PAO1 grown in LB supplemented with 27  $\mu$ M PA $\beta$ N with respect to the same strain grown in LB.

**Table S2. Bacterial strains used in this study**

| Strains                        | Relevant characteristics                                                                                                                                                                | Reference/Source |
|--------------------------------|-----------------------------------------------------------------------------------------------------------------------------------------------------------------------------------------|------------------|
| <i>P. aeruginosa</i>           |                                                                                                                                                                                         |                  |
| PAO1                           | PAO1 wild type strain ATCC15692                                                                                                                                                         | ATCC             |
| PAO1-KP                        | PAO1 wild type strain gently provided by Prof. K. Poole, Queen's University, Kingston, Canada                                                                                           | <sup>34</sup>    |
| PAO1-KP $\Delta$ efflux        | PAO1-KP mutant strain carrying mutations in the efflux pumps MexAB-OprM, MexCD-OprJ, MexEF-OprN and MexXY-OprM. Gently provided by Prof. K. Poole, Queen's University, Kingston, Canada | <sup>34</sup>    |
| PA14-R3                        | biosensor strain for 3OC <sub>12</sub> -HSL quantification                                                                                                                              | 51               |
| PAO1 $\Delta$ pqsAH PpqsA::lux | biosensor strain for HHQ/PQS quantification                                                                                                                                             | 54               |
| PAO-JP2 pKD-rhlA               | biosensor strain for C <sub>4</sub> -HSL quantification                                                                                                                                 | 55               |

**Additional references for Table S1:**

54. Fletcher, M. P. *et al.* A dual biosensor for 2-alkyl-4-quinolone quorum-sensing signal molecules. *Environ. Microbiol.* **9**, 2683-2693 (2007).
55. Duan, K. & Surette, M. G. Environmental regulation of *Pseudomonas aeruginosa* PAO1 Las and Rhl quorum-sensing systems. *J. Bacteriol.* **189**, 4827-4836 (2007).

**Table S3. Oligonucleotides used in this study**

| Name              | Sequence (5'-3') <sup>a</sup>       | Restriction site <sup>b</sup> |
|-------------------|-------------------------------------|-------------------------------|
| FW <i>pqsB</i>    | CCGCT <u>CGAG</u> CGACCAGGGCTATCGCA | XhoI                          |
| RV <i>pqsB</i>    | CCGGAATTCCTTATGCATGAGCTTCTCC        | EcoRI                         |
| FW16SRT           | AGTACGGCCGCAAGGTTAAA                | -                             |
| RV16SRT           | CCCAACATCTCACGACACGA                | -                             |
| FW <i>aprXRT</i>  | CTGCCGATCAACGTCTCCTT                | -                             |
| RV <i>aprXRT</i>  | TACCGTAGAACTTGGCGCTG                | -                             |
| FW <i>sodMRT</i>  | CGTTCAAGGATGCGTTCACC                | -                             |
| RV <i>sodMRT</i>  | GCGGTTCTGGTACTTCAGGT                | -                             |
| FW <i>norBRT</i>  | TTCCTGTTCAACGTCCGCAT                | -                             |
| RV <i>norBRT</i>  | GCACCCATGATCAGTTCCCA                | -                             |
| FW <i>qteERT</i>  | GATGCGGTGAGCGACTACAT                | -                             |
| RV <i>qteERT</i>  | GAAGATGCTGGTTGGCATCG                | -                             |
| FW <i>pvdQRT</i>  | GAAGACGCTCGAGGAGATGG                | -                             |
| RV <i>pvdQRT</i>  | TGAAGCGCTGGAAGTAGACG                | -                             |
| FW <i>pvdSRT</i>  | GGAACAACGTCTACCCGCA                 | -                             |
| RV <i>pvdSRT</i>  | GTAGCTGAGCTGTGCCTTGA                | -                             |
| FW <i>fumCIRT</i> | GAACTGAACGTGATGCTGCC                | -                             |
| RV <i>fumCIRT</i> | TTTCCGCAGCCTTCTGGTAG                | -                             |

<sup>a</sup> Engineered restriction sites are underlined.

<sup>b</sup> -, no restriction site introduced.

**Figure S1. Effect of PABN on *P. aeruginosa* growth**

Growth of *P. aeruginosa* PAO1 in LB in the absence or in the presence of the indicated PABN concentrations. The average of at least three independent experiments is reported with SD.

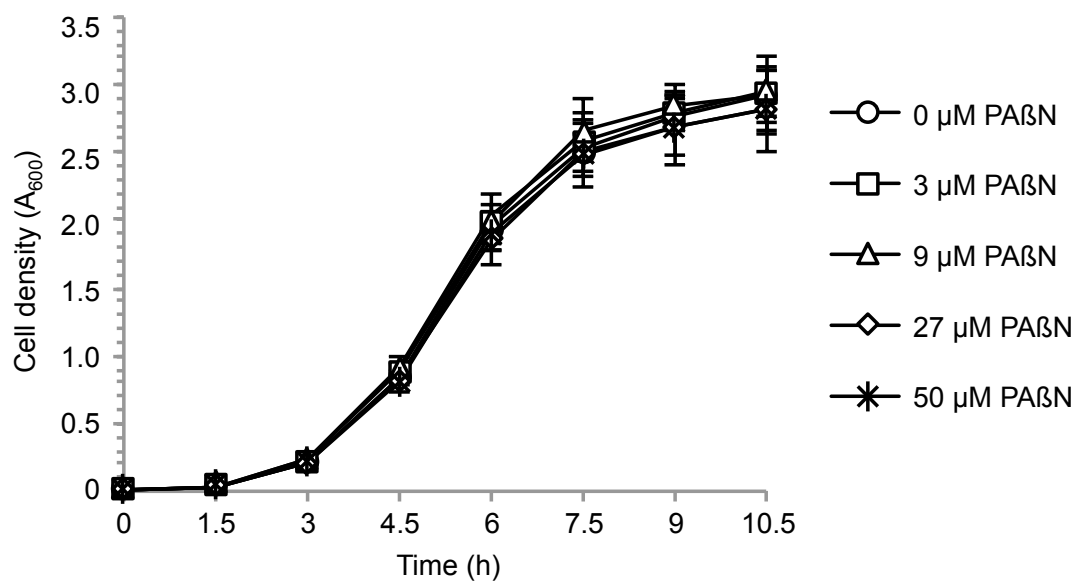

**Figure S2. Effect of PA $\beta$ N on the promoter activity of *lasI* and *lasR* genes**

*PlasI* and *PlasR* promoter activity measured in the *P. aeruginosa* PAO1 strain carrying a chromosomally inserted cassettes *PlasI::lux* or *PlasR::lux*, respectively. The strains were grown at 37°C with 120 rpm shaking in LB in the absence or in the presence of 27  $\mu$ M PA $\beta$ N. Promoter activity is reported as Relative Light Units (RLUs) normalized to bacterial cell density ( $A_{600}$ ). The average of three independent experiments is reported with SD.

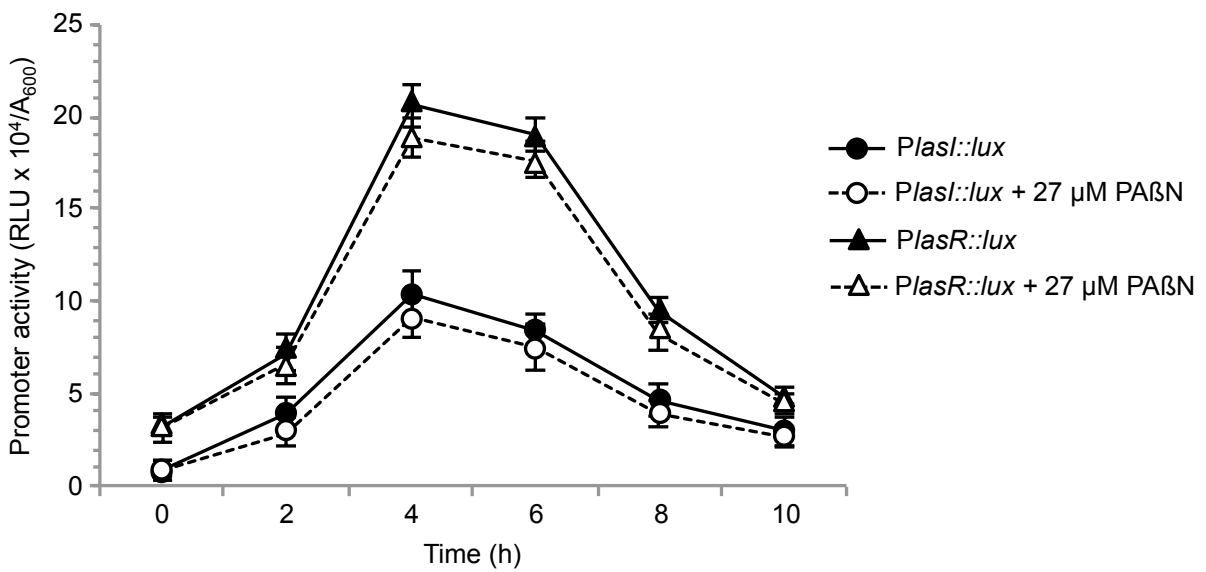

Supplement: 41598_2017_11892_MOESM1_ESM.pdf [file 41598_2017_11892_MOESM1_ESM.pdf]
